# Supplementary material
Source: PubMed Central journal article supplement (PMC3812800)
Supplement: NIHMS518402-supplement-1_si_001.pdf [file NIHMS518402-supplement-1_si_001.pdf]

# Long-Circulating Heparin-Functionalized Magnetic Nanoparticles for Potential Application as a Protein Drug Delivery Platform

Jian Zhang,<sup>†,‡,#</sup> Meong Cheol Shin,<sup>†,‡,#</sup> Allan E. David,<sup>§</sup> Jie Zhou,<sup>||</sup> Kyuri Lee,<sup>‡</sup> Huining He,<sup>†</sup> Victor  
C. Yang<sup>\*,†,‡</sup>

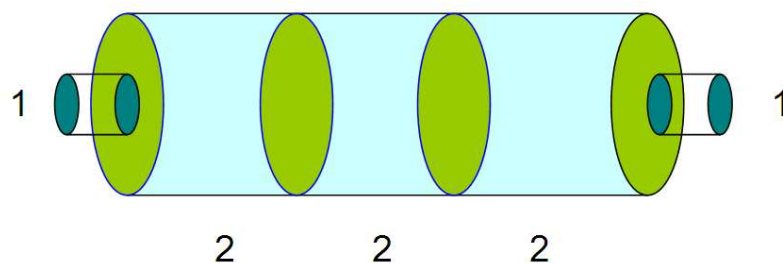

- 1) **D48-N52 cylindrical permanent ferro-magnet,  
(6.4 mm-diameter × 12.7 mm-thickness)**
- 2) **DY0Y0-N52 cylindrical permanent ferro-magnets  
(51 mm diameter × 51 mm thickness)  
(Please go to "<http://www.kjmagnetics.com/>"  
for detailed information about the magnets)**

Figure S1: The scheme of the setup of the magnets for magnetic targeting
